# Supplementary material for: Regional impacts of energy technologies’ cost of capital on decarbonisation
Source: Research Square preprint supplement (doi:10.21203/rs.3.rs-6743038/v1), 2025-07-10
Supplement: Supplementary file 1 [file 6a75b34396156467b124e327.docx]

# Supplementary information

Table S1: Baseline (2018), inflated (2024), survey-based (2050), and fragmented WACC values (2050)

| **Countries** | **Year** | **Coal-fired plant** | **Gas plants** | **Nuclear plant** | **Hydro** | **Biomass** | **CCS** | **Solar PV** | **Onshore Wind** | **Offshore Wind** | **Green Hydrogen** | |
| --- | --- | --- | --- | --- | --- | --- | --- | --- | --- | --- | --- | --- |
| **Baseline WACC values by country and technology taken from (Calcaterra et al., 2024; IRENA, 2022)** | | | | | | | | | | | | |
| Algeria | 2018 | 11.4% | 9.2% | 11.0% | 10.2% | 11.4% | 11.4% | 13.1% | 13.4% | 13.4% | 13.3% | |
| Argentina | 2018 | 15.2% | 13.0% | 14.8% | 14.0% | 15.2% | 15.2% | 15.5% | 15.8% | 15.8% | 15.7% | |
| Australia | 2018 | 5.1% | 2.9% | 4.7% | 4.0% | 5.1% | 5.1% | 3.7% | 4.8% | 6.2% | 4.9% | |
| Austria | 2018 | 5.4% | 3.2% | 5.1% | 4.3% | 5.4% | 5.4% | 5.1% | 4.3% | 6.7% | 5.3% | |
| Azerbaijan | 2018 | 7.6% | 5.4% | 7.3% | 6.5% | 7.6% | 7.6% | 8.7% | 9.0% | 9.0% | 8.9% | |
| Bangladesh | 2018 | 8.1% | 5.9% | 7.8% | 7.0% | 8.1% | 8.1% | 8.5% | 8.8% | 8.8% | 8.7% | |
| Belarus | 2018 | 10.5% | 8.4% | 10.2% | 9.4% | 10.5% | 10.5% | 11.6% | 11.9% | 11.9% | 11.8% | |
| Belgium | 2018 | 5.6% | 3.4% | 5.2% | 4.5% | 5.6% | 5.6% | 4.2% | 5.4% | 5.4% | 5.0% | |
| Bolivia | 2018 | 9.7% | 7.5% | 9.4% | 8.6% | 9.7% | 9.7% | 10.4% | 10.7% | 10.7% | 10.6% | |
| Bosnia and Herzegovina | 2018 | 10.5% | 8.4% | 10.2% | 9.4% | 10.5% | 10.5% | 12.1% | 12.4% | 12.4% | 12.3% | |
| Brazil | 2018 | 7.6% | 5.4% | 7.3% | 6.5% | 7.6% | 7.6% | 8.0% | 6.8% | 8.3% | 7.7% | |
| Bulgaria | 2018 | 6.4% | 4.2% | 6.1% | 5.3% | 6.4% | 6.4% | 6.5% | 6.8% | 8.2% | 7.2% | |
| Burkina Faso | 2018 | 9.7% | 7.5% | 9.4% | 8.6% | 9.7% | 9.7% | 7.7% | 10.5% | 10.5% | 9.6% | |
| Canada | 2018 | 5.1% | 2.9% | 4.7% | 4.0% | 5.1% | 5.1% | 6.0% | 5.0% | 6.3% | 5.8% | |
| Chile | 2018 | 5.7% | 3.5% | 5.3% | 4.5% | 5.7% | 5.7% | 5.2% | 5.5% | 6.8% | 5.8% | |
| China | 2018 | 5.7% | 3.5% | 5.3% | 4.5% | 5.7% | 5.7% | 4.4% | 4.5% | 6.9% | 5.3% | |
| Colombia | 2018 | 6.7% | 4.5% | 6.3% | 5.5% | 6.7% | 6.7% | 7.3% | 7.6% | 7.6% | 7.5% | |
| Costa Rica | 2018 | 9.7% | 7.5% | 9.4% | 8.6% | 9.7% | 9.7% | 10.1% | 7.6% | 10.4% | 9.4% | |
| Croatia | 2018 | 7.2% | 5.0% | 6.8% | 6.0% | 7.2% | 7.2% | 8.3% | 6.1% | 8.6% | 7.7% | |
| Cuba | 2018 | 12.6% | 10.5% | 12.3% | 11.5% | 12.6% | 12.6% | 13.3% | 13.6% | 13.6% | 13.5% | |
| Cyprus | 2018 | 7.6% | 5.4% | 7.3% | 6.5% | 7.6% | 7.6% | 7.6% | 7.9% | 9.3% | 8.3% | |
| Czech Republic | 2018 | 5.6% | 3.4% | 5.2% | 4.5% | 5.6% | 5.6% | 5.4% | 7.0% | 7.0% | 6.5% | |
| Denmark | 2018 | 5.1% | 2.9% | 4.7% | 4.0% | 5.1% | 5.1% | 4.8% | 4.1% | 4.1% | 4.3% | |
| Dominican Republic | 2018 | 8.1% | 5.9% | 7.8% | 7.0% | 8.1% | 8.1% | 7.3% | 9.0% | 9.0% | 8.5% | |
| Ecuador | 2018 | 13.5% | 11.3% | 13.1% | 12.3% | 13.5% | 13.5% | 13.9% | 14.2% | 14.2% | 14.1% | |
| Egypt | 2018 | 9.7% | 7.5% | 9.4% | 8.6% | 9.7% | 9.7% | 10.5% | 10.8% | 10.8% | 10.7% | |
| El Salvador | 2018 | 10.5% | 8.4% | 10.2% | 9.4% | 10.5% | 10.5% | 8.2% | 11.1% | 11.1% | 10.1% | |
| Estonia | 2018 | 5.7% | 3.5% | 5.3% | 4.5% | 5.7% | 5.7% | 6.8% | 4.7% | 7.1% | | 6.2% |
| Ethiopia | 2018 | 11.4% | 9.2% | 11.0% | 10.2% | 11.4% | 11.4% | 10.1% | 7.7% | 10.4% | | 9.4% |
| Finland | 2018 | 5.4% | 3.2% | 5.1% | 4.3% | 5.4% | 5.4% | 6.5% | 4.4% | 6.8% | | 5.9% |
| France | 2018 | 5.5% | 3.3% | 5.2% | 4.4% | 5.5% | 5.5% | 5.1% | 4.3% | 6.7% | | 5.4% |
| Germany | 2018 | 5.1% | 2.9% | 4.7% | 4.0% | 5.1% | 5.1% | 3.6% | 3.8% | 4.8% | | 4.1% |
| Ghana | 2018 | 10.5% | 8.4% | 10.2% | 9.4% | 10.5% | 10.5% | 11.2% | 11.5% | 11.5% | | 11.4% |
| Greece | 2018 | 8.1% | 5.9% | 7.8% | 7.0% | 8.1% | 8.1% | 6.4% | 6.6% | 9.2% | | 7.4% |
| Guatemala | 2018 | 7.2% | 5.0% | 6.8% | 6.0% | 7.2% | 7.2% | 8.0% | 8.3% | 8.3% | | 8.2% |
| Honduras | 2018 | 8.9% | 6.7% | 8.5% | 7.7% | 8.9% | 8.9% | 6.5% | 7.9% | 9.5% | | 8.0% |
| Hungary | 2018 | 6.9% | 4.7% | 6.6% | 5.8% | 6.9% | 6.9% | 7.1% | 8.8% | 8.8% | | 8.2% |
| India | 2018 | 6.9% | 4.7% | 6.6% | 5.8% | 6.9% | 6.9% | 6.2% | 6.4% | 7.9% | | 6.8% |
| Indonesia | 2018 | 6.7% | 4.5% | 6.3% | 5.5% | 6.7% | 6.7% | 7.7% | 8.0% | 8.0% | | 7.9% |
| Iran | 2018 | 9.7% | 7.5% | 9.4% | 8.6% | 9.7% | 9.7% | 13.1% | 13.4% | 13.4% | | 13.3% |
| Iraq | 2018 | 11.4% | 9.2% | 11.0% | 10.2% | 11.4% | 11.4% | 11.3% | 11.6% | 11.6% | | 11.5% |
| Ireland | 2018 | 5.8% | 3.6% | 5.5% | 4.7% | 5.8% | 5.8% | 7.2% | 5.0% | 7.5% | | 6.6% |
| Israel | 2018 | 5.7% | 3.5% | 5.3% | 4.5% | 5.7% | 5.7% | 5.4% | 7.0% | 7.0% | | 6.4% |
| Italy | 2018 | 6.9% | 4.7% | 6.6% | 5.8% | 6.9% | 6.9% | 5.4% | 6.7% | 8.1% | | 6.8% |
| Jamaica | 2018 | 9.7% | 7.5% | 9.4% | 8.6% | 9.7% | 9.7% | 8.9% | 9.1% | 10.7% | | 9.6% |
| Japan | 2018 | 5.7% | 3.5% | 5.3% | 4.5% | 5.7% | 5.7% | 4.2% | 6.7% | 6.7% | | 5.9% |
| Jordan | 2018 | 8.9% | 6.7% | 8.5% | 7.7% | 8.9% | 8.9% | 7.5% | 8.7% | 10.2% | | 8.8% |
| Kazakhstan | 2018 | 6.9% | 4.7% | 6.6% | 5.8% | 6.9% | 6.9% | 8.0% | 8.3% | 8.3% | | 8.2% |
| Kenya | 2018 | 9.7% | 7.5% | 9.4% | 8.6% | 9.7% | 9.7% | 10.1% | 7.7% | 10.4% | | 9.4% |
| Korea, Republic of | 2018 | 5.5% | 3.3% | 5.2% | 4.4% | 5.5% | 5.5% | 5.1% | 6.8% | 6.8% | | 6.2% |
| Kuwait | 2018 | 5.7% | 3.5% | 5.3% | 4.5% | 5.7% | 5.7% | 7.0% | 7.3% | 7.3% | | 7.2% |
| Latvia | 2018 | 6.1% | 3.9% | 5.7% | 5.0% | 6.1% | 6.1% | 7.2% | 7.5% | 7.5% | | 7.4% |
| Lebanon | 2018 | 22.9% | 20.7% | 22.5% | 21.7% | 22.9% | 22.9% | 22.7% | 23.0% | 23.0% | | 22.9% |
| Lithuania | 2018 | 5.8% | 3.6% | 5.5% | 4.7% | 5.8% | 5.8% | 7.4% | 5.2% | 7.7% | | 6.8% |
| Luxembourg | 2018 | 5.1% | 2.9% | 4.7% | 4.0% | 5.1% | 5.1% | 4.8% | 5.0% | 6.4% | | 5.4% |
| Malaysia | 2018 | 6.1% | 3.9% | 5.7% | 5.0% | 6.1% | 6.1% | 7.1% | 7.3% | 7.3% | | 7.2% |
| Malta | 2018 | 5.8% | 3.6% | 5.5% | 4.7% | 5.8% | 5.8% | 4.0% | 6.7% | 6.7% | | 5.8% |
| Mauritius | 2018 | 6.7% | 4.5% | 6.3% | 5.5% | 6.7% | 6.7% | 6.3% | 8.0% | 8.0% | | 7.5% |
| Mexico | 2018 | 6.4% | 4.2% | 6.1% | 5.3% | 6.4% | 6.4% | 7.1% | 6.0% | 7.4% | | 6.9% |
| Mongolia | 2018 | 10.5% | 8.4% | 10.2% | 9.4% | 10.5% | 10.5% | 9.7% | 8.7% | 11.5% | | 10.0% |
| Montenegro | 2018 | 8.9% | 6.7% | 8.5% | 7.7% | 8.9% | 8.9% | 10.5% | 8.2% | 10.8% | | 9.8% |
| Morocco | 2018 | 7.2% | 5.0% | 6.8% | 6.0% | 7.2% | 7.2% | 7.8% | 5.6% | 8.1% | | 7.1% |
| Myanmar | 2018 | 15.2% | 13.0% | 14.8% | 14.0% | 15.2% | 15.2% | 11.2% | 11.5% | 11.5% | | 11.4% |
| Namibia | 2018 | 8.1% | 5.9% | 7.8% | 7.0% | 8.1% | 8.1% | 6.1% | 8.8% | 8.8% | | 7.9% |
| Netherlands | 2018 | 5.1% | 2.9% | 4.7% | 4.0% | 5.1% | 5.1% | 3.8% | 4.0% | 6.4% | | 4.7% |
| New Zealand | 2018 | 5.1% | 2.9% | 4.7% | 4.0% | 5.1% | 5.1% | 6.0% | 4.9% | 6.3% | | 5.7% |
| Nicaragua | 2018 | 10.5% | 8.4% | 10.2% | 9.4% | 10.5% | 10.5% | 10.9% | 8.3% | 11.1% | | 10.1% |
| Norway | 2018 | 5.1% | 2.9% | 4.7% | 4.0% | 5.1% | 5.1% | 6.2% | 6.5% | 6.5% | | 6.4% |
| Pakistan | 2018 | 10.5% | 8.4% | 10.2% | 9.4% | 10.5% | 10.5% | 10.9% | 11.2% | 11.2% | | 11.1% |
| Panama | 2018 | 6.7% | 4.5% | 6.3% | 5.5% | 6.7% | 6.7% | 6.0% | 6.2% | 7.6% | | 6.6% |
| Peru | 2018 | 6.1% | 3.9% | 5.7% | 5.0% | 6.1% | 6.1% | 6.9% | 7.1% | 7.1% | | 7.0% |
| Philippines | 2018 | 6.7% | 4.5% | 6.3% | 5.5% | 6.7% | 6.7% | 7.4% | 7.7% | 7.7% | | 7.6% |
| Poland | 2018 | 5.8% | 3.6% | 5.5% | 4.7% | 5.8% | 5.8% | 6.9% | 4.8% | 7.2% | | 6.3% |
| Portugal | 2018 | 6.9% | 4.7% | 6.6% | 5.8% | 6.9% | 6.9% | 8.0% | 5.7% | 8.3% | | 7.3% |
| Romania | 2018 | 6.9% | 4.7% | 6.6% | 5.8% | 6.9% | 6.9% | 6.8% | 6.0% | 8.5% | | 7.1% |
| Russian Federation | 2018 | 6.9% | 4.7% | 6.6% | 5.8% | 6.9% | 6.9% | 8.0% | 8.3% | 8.3% | | 8.2% |
| Rwanda | 2018 | 9.7% | 7.5% | 9.4% | 8.6% | 9.7% | 9.7% | 7.5% | 10.4% | 10.4% | | 9.4% |
| Saudi Arabia | 2018 | 5.7% | 3.5% | 5.3% | 4.5% | 5.7% | 5.7% | 7.9% | 8.2% | 8.2% | | 8.1% |
| Senegal | 2018 | 8.1% | 5.9% | 7.8% | 7.0% | 8.1% | 8.1% | 6.2% | 8.9% | 8.9% | | 8.0% |
| Singapore | 2018 | 5.1% | 2.9% | 4.7% | 4.0% | 5.1% | 5.1% | 6.3% | 6.6% | 6.6% | | 6.5% |
| Slovakia | 2018 | 5.8% | 3.6% | 5.5% | 4.7% | 5.8% | 5.8% | 5.5% | 7.2% | 7.2% | | 6.6% |
| Slovenia | 2018 | 6.1% | 3.9% | 5.7% | 5.0% | 6.1% | 6.1% | 5.9% | 7.5% | 7.5% | | 7.0% |
| South Africa | 2018 | 7.6% | 5.4% | 7.3% | 6.5% | 7.6% | 7.6% | 6.9% | 8.6% | 8.6% | | 8.0% |
| Spain | 2018 | 6.4% | 4.2% | 6.1% | 5.3% | 6.4% | 6.4% | 7.3% | 5.1% | 7.6% | | 6.7% |
| Sri Lanka | 2018 | 11.4% | 9.2% | 11.0% | 10.2% | 11.4% | 11.4% | 12.0% | 12.3% | 12.3% | | 12.2% |
| Sweden | 2018 | 5.1% | 2.9% | 4.7% | 4.0% | 5.1% | 5.1% | 6.2% | 4.1% | 6.5% | | 5.6% |
| Switzerland | 2018 | 5.1% | 2.9% | 4.7% | 4.0% | 5.1% | 5.1% | 4.1% | 6.7% | 6.7% | | 5.8% |
| Taiwan | 2018 | 5.6% | 3.4% | 5.2% | 4.5% | 5.6% | 5.6% | 5.4% | 7.0% | 7.0% | | 6.5% |
| Thailand | 2018 | 6.4% | 4.2% | 6.1% | 5.3% | 6.4% | 6.4% | 6.2% | 7.8% | 7.8% | | 7.3% |
| Tunisia | 2018 | 10.5% | 8.4% | 10.2% | 9.4% | 10.5% | 10.5% | 11.0% | 11.3% | 11.3% | | 11.2% |
| Turkey | 2018 | 9.7% | 7.5% | 9.4% | 8.6% | 9.7% | 9.7% | 9.2% | 9.5% | 11.0% | | 9.9% |
| Uganda | 2018 | 9.7% | 7.5% | 9.4% | 8.6% | 9.7% | 9.7% | 10.1% | 10.4% | 10.4% | | 10.3% |
| Ukraine | 2018 | 10.5% | 8.4% | 10.2% | 9.4% | 10.5% | 10.5% | 11.6% | 11.9% | 11.9% | | 11.8% |
| United Arab Emirates | 2018 | 5.5% | 3.3% | 5.2% | 4.4% | 5.5% | 5.5% | 7.3% | 7.6% | 7.6% | | 7.5% |
| United Kingdom | 2018 | 5.6% | 3.4% | 5.2% | 4.5% | 5.6% | 5.6% | 4.4% | 4.6% | 4.6% | | 4.5% |
| United States of America | 2018 | 5.1% | 2.9% | 4.7% | 4.0% | 5.1% | 5.1% | 6.0% | 4.9% | 6.3% | | 5.8% |
| Uruguay | 2018 | 6.7% | 4.5% | 6.3% | 5.5% | 6.7% | 6.7% | 5.9% | 5.1% | 7.6% | | 6.2% |
| Venezuela | 2018 | 22.9% | 20.7% | 22.5% | 21.7% | 22.9% | 22.9% | 20.4% | 20.7% | 20.7% | | 20.6% |
| Viet Nam | 2018 | 8.1% | 5.9% | 7.8% | 7.0% | 8.1% | 8.1% | 9.1% | 9.4% | 9.4% | | 9.3% |
| Yemen | 2018 | 22.9% | 20.7% | 22.5% | 21.7% | 22.9% | 22.9% | 19.1% | 22.6% | 22.6% | | 21.4% |
| **Inflated WACC values by country and technology** | | | | | | | | | | | | |
| Algeria | 2024 | 13.7% | 11.5% | 13.4% | 12.6% | 13.7% | 13.7% | 15.1% | 15.4% | 15.4% | | 15.3% |
| Argentina | 2024 | 17.5% | 15.3% | 17.1% | 16.4% | 17.5% | 17.5% | 17.5% | 17.8% | 17.8% | | 17.7% |
| Australia | 2024 | 7.4% | 5.2% | 7.1% | 6.3% | 7.4% | 7.4% | 5.7% | 6.9% | 8.3% | | 7.0% |
| Austria | 2024 | 7.8% | 5.6% | 7.4% | 6.6% | 7.8% | 7.8% | 7.1% | 6.3% | 8.7% | | 7.4% |
| Azerbaijan | 2024 | 9.9% | 7.8% | 9.6% | 8.8% | 9.9% | 9.9% | 10.7% | 11.0% | 11.0% | | 10.9% |
| Bangladesh | 2024 | 10.4% | 8.3% | 10.1% | 9.3% | 10.4% | 10.4% | 10.6% | 10.9% | 10.9% | | 10.8% |
| Belarus | 2024 | 12.9% | 10.7% | 12.5% | 11.7% | 12.9% | 12.9% | 13.7% | 14.0% | 14.0% | | 13.9% |
| Belgium | 2024 | 7.9% | 5.7% | 7.6% | 6.8% | 7.9% | 7.9% | 6.3% | 7.5% | 7.5% | | 7.1% |
| Bolivia | 2024 | 12.0% | 9.9% | 11.7% | 10.9% | 12.0% | 12.0% | 12.4% | 12.7% | 12.7% | | 12.6% |
| Bosnia and Herzegovina | 2024 | 12.9% | 10.7% | 12.5% | 11.7% | 12.9% | 12.9% | 14.2% | 14.5% | 14.5% | | 14.4% |
| Brazil | 2024 | 9.9% | 7.8% | 9.6% | 8.8% | 9.9% | 9.9% | 10.1% | 8.9% | 10.4% | | 9.8% |
| Bulgaria | 2024 | 8.8% | 6.6% | 8.4% | 7.6% | 8.8% | 8.8% | 8.6% | 8.8% | 10.2% | | 9.2% |
| Burkina Faso | 2024 | 12.0% | 9.9% | 11.7% | 10.9% | 12.0% | 12.0% | 9.7% | 12.6% | 12.6% | | 11.6% |
| Canada | 2024 | 7.4% | 5.2% | 7.1% | 6.3% | 7.4% | 7.4% | 8.1% | 7.0% | 8.4% | | 7.8% |
| Chile | 2024 | 8.0% | 5.8% | 7.7% | 6.9% | 8.0% | 8.0% | 7.3% | 7.5% | 8.9% | | 7.9% |
| China | 2024 | 8.0% | 5.8% | 7.7% | 6.9% | 8.0% | 8.0% | 6.4% | 6.6% | 9.0% | | 7.3% |
| Colombia | 2024 | 9.0% | 6.8% | 8.7% | 7.9% | 9.0% | 9.0% | 9.4% | 9.7% | 9.7% | | 9.6% |
| Costa Rica | 2024 | 12.0% | 9.9% | 11.7% | 10.9% | 12.0% | 12.0% | 12.2% | 9.7% | 12.4% | | 11.4% |
| Croatia | 2024 | 9.5% | 7.3% | 9.2% | 8.4% | 9.5% | 9.5% | 10.4% | 8.2% | 10.7% | | 9.7% |
| Cuba | 2024 | 15.0% | 12.8% | 14.6% | 13.8% | 15.0% | 15.0% | 15.4% | 15.7% | 15.7% | | 15.6% |
| Cyprus | 2024 | 9.9% | 7.8% | 9.6% | 8.8% | 9.9% | 9.9% | 9.7% | 9.9% | 11.3% | | 10.3% |
| Czech Republic | 2024 | 7.9% | 5.7% | 7.6% | 6.8% | 7.9% | 7.9% | 7.5% | 9.1% | 9.1% | | 8.5% |
| Denmark | 2024 | 7.4% | 5.2% | 7.1% | 6.3% | 7.4% | 7.4% | 6.9% | 6.1% | 6.1% | | 6.4% |
| Dominican Republic | 2024 | 10.4% | 8.3% | 10.1% | 9.3% | 10.4% | 10.4% | 9.4% | 11.1% | 11.1% | | 10.5% |
| Ecuador | 2024 | 15.8% | 13.6% | 15.5% | 14.7% | 15.8% | 15.8% | 16.0% | 16.3% | 16.3% | | 16.2% |
| Egypt | 2024 | 12.0% | 9.9% | 11.7% | 10.9% | 12.0% | 12.0% | 12.6% | 12.9% | 12.9% | | 12.8% |
| El Salvador | 2024 | 12.9% | 10.7% | 12.5% | 11.7% | 12.9% | 12.9% | 10.2% | 13.2% | 13.2% | | 12.2% |
| Estonia | 2024 | 8.0% | 5.8% | 7.7% | 6.9% | 8.0% | 8.0% | 8.8% | 6.7% | 9.1% | | 8.2% |
| Ethiopia | 2024 | 13.7% | 11.5% | 13.4% | 12.6% | 13.7% | 13.7% | 12.2% | 9.8% | 12.4% | | 11.4% |
| Finland | 2024 | 7.8% | 5.6% | 7.4% | 6.6% | 7.8% | 7.8% | 8.6% | 6.5% | 8.9% | | 8.0% |
| France | 2024 | 7.8% | 5.7% | 7.5% | 6.7% | 7.8% | 7.8% | 7.1% | 6.3% | 8.8% | | 7.4% |
| Germany | 2024 | 7.4% | 5.2% | 7.1% | 6.3% | 7.4% | 7.4% | 5.7% | 5.9% | 6.9% | | 6.1% |
| Ghana | 2024 | 12.9% | 10.7% | 12.5% | 11.7% | 12.9% | 12.9% | 13.2% | 13.5% | 13.5% | | 13.4% |
| Greece | 2024 | 10.4% | 8.3% | 10.1% | 9.3% | 10.4% | 10.4% | 8.5% | 8.7% | 11.3% | | 9.5% |
| Guatemala | 2024 | 9.5% | 7.3% | 9.2% | 8.4% | 9.5% | 9.5% | 10.1% | 10.4% | 10.4% | | 10.3% |
| Honduras | 2024 | 11.2% | 9.0% | 10.9% | 10.1% | 11.2% | 11.2% | 8.6% | 10.0% | 11.5% | | 10.0% |
| Hungary | 2024 | 9.3% | 7.1% | 8.9% | 8.1% | 9.3% | 9.3% | 9.1% | 10.8% | 10.8% | | 10.3% |
| India | 2024 | 9.3% | 7.1% | 8.9% | 8.1% | 9.3% | 9.3% | 8.3% | 8.5% | 9.9% | | 8.9% |
| Indonesia | 2024 | 9.0% | 6.8% | 8.7% | 7.9% | 9.0% | 9.0% | 9.7% | 10.0% | 10.0% | | 9.9% |
| Iran | 2024 | 12.0% | 9.9% | 11.7% | 10.9% | 12.0% | 12.0% | 15.2% | 15.5% | 15.5% | | 15.4% |
| Iraq | 2024 | 13.7% | 11.5% | 13.4% | 12.6% | 13.7% | 13.7% | 13.3% | 13.6% | 13.6% | | 13.5% |
| Ireland | 2024 | 8.1% | 5.9% | 7.8% | 7.0% | 8.1% | 8.1% | 9.2% | 7.1% | 9.5% | | 8.6% |
| Israel | 2024 | 8.0% | 5.8% | 7.7% | 6.9% | 8.0% | 8.0% | 7.4% | 9.0% | 9.0% | | 8.5% |
| Italy | 2024 | 9.3% | 7.1% | 8.9% | 8.1% | 9.3% | 9.3% | 7.5% | 8.7% | 10.2% | | 8.8% |
| Jamaica | 2024 | 12.0% | 9.9% | 11.7% | 10.9% | 12.0% | 12.0% | 11.0% | 11.2% | 12.7% | | 11.6% |
| Japan | 2024 | 8.0% | 5.8% | 7.7% | 6.9% | 8.0% | 8.0% | 6.2% | 8.8% | 8.8% | | 7.9% |
| Jordan | 2024 | 11.2% | 9.0% | 10.9% | 10.1% | 11.2% | 11.2% | 9.5% | 10.7% | 12.2% | | 10.8% |
| Kazakhstan | 2024 | 9.3% | 7.1% | 8.9% | 8.1% | 9.3% | 9.3% | 10.1% | 10.3% | 10.3% | | 10.3% |
| Kenya | 2024 | 12.0% | 9.9% | 11.7% | 10.9% | 12.0% | 12.0% | 12.2% | 9.8% | 12.4% | | 11.4% |
| Korea, Republic of | 2024 | 7.8% | 5.7% | 7.5% | 6.7% | 7.8% | 7.8% | 7.2% | 8.8% | 8.8% | | 8.3% |
| Kuwait | 2024 | 8.0% | 5.8% | 7.7% | 6.9% | 8.0% | 8.0% | 9.0% | 9.3% | 9.3% | | 9.2% |
| Latvia | 2024 | 8.4% | 6.2% | 8.1% | 7.3% | 8.4% | 8.4% | 9.2% | 9.5% | 9.5% | | 9.4% |
| Lebanon | 2024 | 25.2% | 23.0% | 24.8% | 24.1% | 25.2% | 25.2% | 24.7% | 25.0% | 25.0% | | 24.9% |
| Lithuania | 2024 | 8.1% | 5.9% | 7.8% | 7.0% | 8.1% | 8.1% | 9.4% | 7.3% | 9.7% | | 8.8% |
| Luxembourg | 2024 | 7.4% | 5.2% | 7.1% | 6.3% | 7.4% | 7.4% | 6.8% | 7.0% | 8.4% | | 7.4% |
| Malaysia | 2024 | 8.4% | 6.2% | 8.1% | 7.3% | 8.4% | 8.4% | 9.1% | 9.4% | 9.4% | | 9.3% |
| Malta | 2024 | 8.1% | 5.9% | 7.8% | 7.0% | 8.1% | 8.1% | 6.1% | 8.7% | 8.7% | | 7.9% |
| Mauritius | 2024 | 9.0% | 6.8% | 8.7% | 7.9% | 9.0% | 9.0% | 8.4% | 10.1% | 10.1% | | 9.5% |
| Mexico | 2024 | 8.8% | 6.6% | 8.4% | 7.6% | 8.8% | 8.8% | 9.2% | 8.1% | 9.5% | | 8.9% |
| Mongolia | 2024 | 12.9% | 10.7% | 12.5% | 11.7% | 12.9% | 12.9% | 11.7% | 10.8% | 13.5% | | 12.0% |
| Montenegro | 2024 | 11.2% | 9.0% | 10.9% | 10.1% | 11.2% | 11.2% | 12.5% | 10.3% | 12.8% | | 11.9% |
| Morocco | 2024 | 9.5% | 7.3% | 9.2% | 8.4% | 9.5% | 9.5% | 9.8% | 7.6% | 10.1% | | 9.2% |
| Myanmar | 2024 | 17.5% | 15.3% | 17.1% | 16.4% | 17.5% | 17.5% | 13.2% | 13.5% | 13.5% | | 13.4% |
| Namibia | 2024 | 10.4% | 8.3% | 10.1% | 9.3% | 10.4% | 10.4% | 8.2% | 10.9% | 10.9% | | 10.0% |
| Netherlands | 2024 | 7.4% | 5.2% | 7.1% | 6.3% | 7.4% | 7.4% | 5.8% | 6.0% | 8.4% | | 6.8% |
| New Zealand | 2024 | 7.4% | 5.2% | 7.1% | 6.3% | 7.4% | 7.4% | 8.0% | 7.0% | 8.3% | | 7.8% |
| Nicaragua | 2024 | 12.9% | 10.7% | 12.5% | 11.7% | 12.9% | 12.9% | 12.9% | 10.4% | 13.2% | | 12.2% |
| Norway | 2024 | 7.4% | 5.2% | 7.1% | 6.3% | 7.4% | 7.4% | 8.2% | 8.5% | 8.5% | | 8.4% |
| Pakistan | 2024 | 12.9% | 10.7% | 12.5% | 11.7% | 12.9% | 12.9% | 13.0% | 13.3% | 13.3% | | 13.2% |
| Panama | 2024 | 9.0% | 6.8% | 8.7% | 7.9% | 9.0% | 9.0% | 8.0% | 8.2% | 9.7% | | 8.6% |
| Peru | 2024 | 8.4% | 6.2% | 8.1% | 7.3% | 8.4% | 8.4% | 8.9% | 9.2% | 9.2% | | 9.1% |
| Philippines | 2024 | 9.0% | 6.8% | 8.7% | 7.9% | 9.0% | 9.0% | 9.4% | 9.7% | 9.7% | | 9.6% |
| Poland | 2024 | 8.1% | 5.9% | 7.8% | 7.0% | 8.1% | 8.1% | 9.0% | 6.8% | 9.3% | | 8.4% |
| Portugal | 2024 | 9.3% | 7.1% | 8.9% | 8.1% | 9.3% | 9.3% | 10.0% | 7.8% | 10.3% | | 9.4% |
| Romania | 2024 | 9.3% | 7.1% | 8.9% | 8.1% | 9.3% | 9.3% | 8.8% | 8.0% | 10.5% | | 9.1% |
| Russian Federation | 2024 | 9.3% | 7.1% | 8.9% | 8.1% | 9.3% | 9.3% | 10.1% | 10.3% | 10.3% | | 10.3% |
| Rwanda | 2024 | 12.0% | 9.9% | 11.7% | 10.9% | 12.0% | 12.0% | 9.6% | 12.4% | 12.4% | | 11.5% |
| Saudi Arabia | 2024 | 8.0% | 5.8% | 7.7% | 6.9% | 8.0% | 8.0% | 10.0% | 10.3% | 10.3% | | 10.2% |
| Senegal | 2024 | 10.4% | 8.3% | 10.1% | 9.3% | 10.4% | 10.4% | 8.3% | 11.0% | 11.0% | | 10.1% |
| Singapore | 2024 | 7.4% | 5.2% | 7.1% | 6.3% | 7.4% | 7.4% | 8.4% | 8.7% | 8.7% | | 8.6% |
| Slovakia | 2024 | 8.1% | 5.9% | 7.8% | 7.0% | 8.1% | 8.1% | 7.6% | 9.2% | 9.2% | | 8.7% |
| Slovenia | 2024 | 8.4% | 6.2% | 8.1% | 7.3% | 8.4% | 8.4% | 7.9% | 9.6% | 9.6% | | 9.0% |
| South Africa | 2024 | 9.9% | 7.8% | 9.6% | 8.8% | 9.9% | 9.9% | 8.9% | 10.6% | 10.6% | | 10.1% |
| Spain | 2024 | 8.8% | 6.6% | 8.4% | 7.6% | 8.8% | 8.8% | 9.4% | 7.2% | 9.7% | | 8.7% |
| Sri Lanka | 2024 | 13.7% | 11.5% | 13.4% | 12.6% | 13.7% | 13.7% | 14.1% | 14.4% | 14.4% | | 14.3% |
| Sweden | 2024 | 7.4% | 5.2% | 7.1% | 6.3% | 7.4% | 7.4% | 8.3% | 6.1% | 8.5% | | 7.6% |
| Switzerland | 2024 | 7.4% | 5.2% | 7.1% | 6.3% | 7.4% | 7.4% | 6.1% | 8.7% | 8.7% | | 7.9% |
| Taiwan | 2024 | 7.9% | 5.7% | 7.6% | 6.8% | 7.9% | 7.9% | 7.4% | 9.1% | 9.1% | | 8.5% |
| Thailand | 2024 | 8.8% | 6.6% | 8.4% | 7.6% | 8.8% | 8.8% | 8.2% | 9.9% | 9.9% | | 9.3% |
| Tunisia | 2024 | 12.9% | 10.7% | 12.5% | 11.7% | 12.9% | 12.9% | 13.0% | 13.3% | 13.3% | | 13.2% |
| Turkey | 2024 | 12.0% | 9.9% | 11.7% | 10.9% | 12.0% | 12.0% | 11.3% | 11.5% | 13.0% | | 11.9% |
| Uganda | 2024 | 12.0% | 9.9% | 11.7% | 10.9% | 12.0% | 12.0% | 12.2% | 12.4% | 12.4% | | 12.3% |
| Ukraine | 2024 | 12.9% | 10.7% | 12.5% | 11.7% | 12.9% | 12.9% | 13.7% | 14.0% | 14.0% | | 13.9% |
| United Arab Emirates | 2024 | 7.8% | 5.7% | 7.5% | 6.7% | 7.8% | 7.8% | 9.3% | 9.6% | 9.6% | | 9.5% |
| United Kingdom | 2024 | 7.9% | 5.7% | 7.6% | 6.8% | 7.9% | 7.9% | 6.5% | 6.7% | 6.7% | | 6.6% |
| United States of America | 2024 | 7.4% | 5.2% | 7.1% | 6.3% | 7.4% | 7.4% | 8.1% | 7.0% | 8.4% | | 8.3% |
| Uruguay | 2024 | 9.0% | 6.8% | 8.7% | 7.9% | 9.0% | 9.0% | 8.0% | 7.1% | 9.7% | | 7.8% |
| Venezuela | 2024 | 25.2% | 23.0% | 24.8% | 24.1% | 25.2% | 25.2% | 22.5% | 22.7% | 22.7% | | 22.6% |
| Viet Nam | 2024 | 10.4% | 8.3% | 10.1% | 9.3% | 10.4% | 10.4% | 11.2% | 11.5% | 11.5% | | 11.4% |
| Yemen | 2024 | 25.2% | 23.0% | 24.8% | 24.1% | 25.2% | 25.2% | 21.1% | 24.6% | 24.6% | | 23.5% |
| **WACC values for 2050 by country and technology according to survey results** | | | | | | | | | | | | |
| Algeria | 2050 | 20% | 17% | 15% | 11% | 13% | 10% | 11% | 12% | 12% | | 12% |
| Argentina | 2050 | 24% | 21% | 19% | 15% | 17% | 14% | 13% | 15% | 14% | | 14% |
| Australia | 2050 | 15% | 12% | 10% | 5% | 8% | 5% | 2% | 5% | 5% | | 4% |
| Austria | 2050 | 15% | 12% | 10% | 5% | 8% | 5% | 4% | 5% | 5% | | 5% |
| Azerbaijan | 2050 | 16% | 13% | 12% | 7% | 9% | 7% | 6% | 8% | 8% | | 7% |
| Bangladesh | 2050 | 17% | 14% | 12% | 8% | 10% | 7% | 6% | 8% | 7% | | 7% |
| Belarus | 2050 | 19% | 16% | 14% | 10% | 12% | 10% | 9% | 11% | 11% | | 10% |
| Belgium | 2050 | 16% | 12% | 11% | 5% | 8% | 5% | 6% | 7% | 7% | | 6% |
| Bolivia | 2050 | 19% | 15% | 14% | 9% | 12% | 9% | 8% | 10% | 9% | | 9% |
| Bosnia and Herzegovina | 2050 | 19% | 16% | 14% | 10% | 12% | 10% | 10% | 11% | 11% | | 11% |
| Brazil | 2050 | 16% | 13% | 12% | 7% | 9% | 7% | 6% | 6% | 7% | | 6% |
| Bulgaria | 2050 | 15% | 12% | 10% | 6% | 8% | 6% | 4% | 6% | 7% | | 6% |
| Burkina Faso | 2050 | 14% | 12% | 13% | 9% | 12% | 9% | 4% | 9% | 9% | | 8% |
| Canada | 2050 | 15% | 12% | 10% | 5% | 8% | 5% | 4% | 5% | 5% | | 5% |
| Chile | 2050 | 16% | 12% | 11% | 5% | 8% | 5% | 3% | 4% | 4% | | 3% |
| China | 2050 | 14% | 11% | 10% | 5% | 7% | 5% | 2% | 4% | 6% | | 4% |
| Colombia | 2050 | 16% | 12% | 11% | 6% | 9% | 6% | 5% | 7% | 6% | | 6% |
| Costa Rica | 2050 | 19% | 15% | 14% | 9% | 12% | 9% | 8% | 7% | 9% | | 8% |
| Croatia | 2050 | 17% | 14% | 12% | 7% | 9% | 7% | 5% | 6% | 8% | | 6% |
| Cuba | 2050 | 21% | 18% | 17% | 12% | 14% | 12% | 11% | 13% | 12% | | 12% |
| Cyprus | 2050 | 17% | 14% | 12% | 7% | 10% | 7% | 7% | 6% | 8% | | 7% |
| Czech Republic | 2050 | 16% | 12% | 11% | 5% | 8% | 5% | 2% | 5% | 5% | | 4% |
| Denmark | 2050 | 15% | 12% | 10% | 5% | 8% | 5% | 3% | 4% | 3% | | 3% |
| Dominican Republic | 2050 | 17% | 14% | 12% | 8% | 10% | 7% | 5% | 8% | 8% | | 7% |
| Ecuador | 2050 | 22% | 19% | 17% | 13% | 15% | 13% | 12% | 13% | 13% | | 13% |
| Egypt | 2050 | 19% | 15% | 14% | 9% | 12% | 9% | 8% | 10% | 9% | | 9% |
| El Salvador | 2050 | 19% | 16% | 14% | 10% | 12% | 10% | 6% | 10% | 10% | | 9% |
| Estonia | 2050 | 16% | 12% | 11% | 5% | 8% | 5% | 3% | 5% | 6% | | 5% |
| Ethiopia | 2050 | 16% | 13% | 15% | 11% | 13% | 10% | 7% | 6% | 9% | | 8% |
| Finland | 2050 | 15% | 12% | 10% | 5% | 8% | 5% | 3% | 4% | 6% | | 4% |
| France | 2050 | 15% | 12% | 10% | 5% | 8% | 5% | 5% | 4% | 6% | | 5% |
| Germany | 2050 | 15% | 12% | 10% | 5% | 8% | 5% | 2% | 4% | 4% | | 3% |
| Ghana | 2050 | 19% | 16% | 14% | 10% | 12% | 10% | 9% | 10% | 10% | | 10% |
| Greece | 2050 | 18% | 14% | 13% | 7% | 10% | 7% | 6% | 8% | 8% | | 7% |
| Guatemala | 2050 | 16% | 13% | 11% | 7% | 9% | 6% | 6% | 7% | 7% | | 7% |
| Honduras | 2050 | 18% | 14% | 13% | 8% | 11% | 8% | 4% | 7% | 8% | | 6% |
| Hungary | 2050 | 17% | 13% | 12% | 6% | 9% | 6% | 4% | 5% | 7% | | 5% |
| India | 2050 | 16% | 12% | 11% | 6% | 9% | 6% | 4% | 5% | 7% | | 5% |
| Indonesia | 2050 | 16% | 12% | 11% | 6% | 9% | 6% | 6% | 7% | 7% | | 6% |
| Iran | 2050 | 19% | 15% | 14% | 9% | 12% | 9% | 11% | 12% | 12% | | 12% |
| Iraq | 2050 | 20% | 17% | 15% | 11% | 13% | 10% | 9% | 11% | 10% | | 10% |
| Ireland | 2050 | 16% | 12% | 11% | 5% | 8% | 5% | 6% | 8% | 7% | | 7% |
| Israel | 2050 | 16% | 12% | 11% | 5% | 8% | 5% | 5% | 4% | 6% | | 5% |
| Italy | 2050 | 17% | 14% | 12% | 7% | 9% | 7% | 5% | 9% | 8% | | 7% |
| Jamaica | 2050 | 19% | 15% | 14% | 9% | 12% | 9% | 7% | 8% | 9% | | 8% |
| Japan | 2050 | 16% | 12% | 11% | 5% | 8% | 5% | 4% | 7% | 6% | | 5% |
| Jordan | 2050 | 18% | 14% | 13% | 8% | 11% | 8% | 5% | 8% | 9% | | 7% |
| Kazakhstan | 2050 | 16% | 12% | 11% | 6% | 9% | 6% | 6% | 7% | 7% | | 7% |
| Kenya | 2050 | 19% | 15% | 14% | 9% | 12% | 9% | 8% | 7% | 9% | | 8% |
| Korea, Republic of | 2050 | 16% | 12% | 11% | 5% | 8% | 5% | 3% | 7% | 6% | | 5% |
| Kuwait | 2050 | 16% | 12% | 11% | 5% | 8% | 5% | 2% | 7% | 6% | | 5% |
| Latvia | 2050 | 16% | 12% | 11% | 6% | 8% | 6% | 4% | 7% | 6% | | 5% |
| Lebanon | 2050 | 32% | 28% | 27% | 22% | 25% | 22% | 21% | 22% | 22% | | 21% |
| Lithuania | 2050 | 16% | 12% | 11% | 6% | 8% | 6% | 5% | 5% | 7% | | 5% |
| Luxembourg | 2050 | 15% | 12% | 10% | 5% | 8% | 5% | 3% | 5% | 5% | | 4% |
| Malaysia | 2050 | 15% | 12% | 10% | 6% | 8% | 5% | 5% | 6% | 6% | | 6% |
| Malta | 2050 | 16% | 12% | 11% | 6% | 8% | 6% | 6% | 5% | 7% | | 6% |
| Mauritius | 2050 | 16% | 12% | 11% | 6% | 9% | 6% | 4% | 7% | 7% | | 6% |
| Mexico | 2050 | 15% | 12% | 10% | 6% | 8% | 6% | 5% | 5% | 6% | | 5% |
| Mongolia | 2050 | 19% | 16% | 14% | 10% | 12% | 10% | 7% | 8% | 10% | | 8% |
| Montenegro | 2050 | 18% | 14% | 13% | 8% | 11% | 8% | 8% | 7% | 9% | | 8% |
| Morocco | 2050 | 16% | 13% | 11% | 7% | 9% | 6% | 6% | 5% | 7% | | 6% |
| Myanmar | 2050 | 24% | 21% | 19% | 15% | 17% | 14% | 9% | 10% | 10% | | 10% |
| Namibia | 2050 | 17% | 14% | 12% | 8% | 10% | 7% | 4% | 8% | 7% | | 6% |
| Netherlands | 2050 | 15% | 12% | 10% | 5% | 8% | 5% | 2% | 4% | 5% | | 4% |
| New Zealand | 2050 | 15% | 12% | 10% | 5% | 8% | 5% | 4% | 5% | 5% | | 5% |
| Nicaragua | 2050 | 19% | 16% | 14% | 10% | 12% | 10% | 9% | 7% | 10% | | 9% |
| Norway | 2050 | 15% | 12% | 10% | 5% | 8% | 5% | 4% | 6% | 6% | | 5% |
| Pakistan | 2050 | 19% | 16% | 14% | 10% | 12% | 10% | 9% | 10% | 10% | | 10% |
| Panama | 2050 | 16% | 13% | 11% | 6% | 9% | 6% | 6% | 5% | 7% | | 6% |
| Peru | 2050 | 15% | 12% | 10% | 6% | 8% | 5% | 5% | 6% | 6% | | 6% |
| Philippines | 2050 | 16% | 12% | 11% | 6% | 9% | 6% | 5% | 7% | 6% | | 6% |
| Poland | 2050 | 16% | 12% | 11% | 6% | 8% | 6% | 2% | 7% | 6% | | 5% |
| Portugal | 2050 | 17% | 14% | 12% | 7% | 9% | 7% | 4% | 7% | 7% | | 6% |
| Romania | 2050 | 17% | 14% | 12% | 7% | 9% | 7% | 6% | 6% | 7% | | 6% |
| Russian Federation | 2050 | 16% | 12% | 11% | 6% | 9% | 6% | 6% | 7% | 7% | | 7% |
| Rwanda | 2050 | 14% | 12% | 13% | 9% | 12% | 9% | 4% | 9% | 9% | | 8% |
| Saudi Arabia | 2050 | 16% | 12% | 11% | 5% | 8% | 5% | 5% | 7% | 6% | | 6% |
| Senegal | 2050 | 17% | 14% | 12% | 8% | 10% | 7% | 4% | 8% | 8% | | 6% |
| Singapore | 2050 | 15% | 12% | 10% | 5% | 8% | 5% | 5% | 6% | 6% | | 5% |
| Slovakia | 2050 | 16% | 12% | 11% | 6% | 8% | 6% | 5% | 5% | 6% | | 5% |
| Slovenia | 2050 | 16% | 13% | 11% | 6% | 9% | 6% | 5% | 7% | 7% | | 6% |
| South Africa | 2050 | 16% | 13% | 12% | 7% | 9% | 7% | 5% | 8% | 7% | | 6% |
| Spain | 2050 | 16% | 13% | 11% | 6% | 9% | 6% | 4% | 7% | 7% | | 6% |
| Sri Lanka | 2050 | 20% | 17% | 15% | 11% | 13% | 10% | 10% | 11% | 11% | | 11% |
| Sweden | 2050 | 15% | 12% | 10% | 5% | 8% | 5% | 4% | 4% | 6% | | 4% |
| Switzerland | 2050 | 15% | 12% | 10% | 5% | 8% | 5% | 2% | 6% | 6% | | 5% |
| Taiwan | 2050 | 16% | 12% | 11% | 5% | 8% | 5% | 4% | 7% | 6% | | 5% |
| Thailand | 2050 | 15% | 12% | 10% | 6% | 8% | 6% | 4% | 7% | 6% | | 6% |
| Tunisia | 2050 | 19% | 16% | 14% | 10% | 12% | 10% | 9% | 10% | 10% | | 10% |
| Turkey | 2050 | 19% | 15% | 14% | 9% | 12% | 9% | 7% | 8% | 10% | | 8% |
| Uganda | 2050 | 14% | 12% | 13% | 9% | 12% | 9% | 7% | 9% | 9% | | 9% |
| Ukraine | 2050 | 19% | 16% | 14% | 10% | 12% | 10% | 9% | 11% | 11% | | 10% |
| United Arab Emirates | 2050 | 16% | 12% | 11% | 5% | 8% | 5% | 3% | 4% | 6% | | 4% |
| United Kingdom | 2050 | 16% | 12% | 11% | 5% | 8% | 5% | 4% | 7% | 6% | | 5% |
| United States of America | 2050 | 18% | 15% | 13% | 8% | 11% | 8% | 5% | 6% | 8% | | 6% |
| Uruguay | 2050 | 17% | 13% | 12% | 6% | 9% | 6% | 4% | 6% | 7% | | 5% |
| Venezuela | 2050 | 32% | 28% | 27% | 22% | 25% | 22% | 18% | 20% | 19% | | 19% |
| Viet Nam | 2050 | 17% | 14% | 12% | 8% | 10% | 7% | 7% | 8% | 8% | | 8% |
| Yemen | 2050 | 27% | 25% | 26% | 22% | 25% | 22% | 16% | 21% | 21% | | 20% |
| **Diverging WACC values for 2050 by country and technology** | | | | | | | | | | | | |
| Algeria | 2050 | 10.5% | 8.4% | 10.2% | 9.4% | 10.5% | 10.5% | 11.2% | 11.5% | 11.5% | | 11.4% |
| Argentina | 2050 | 10.5% | 8.4% | 10.2% | 9.4% | 10.5% | 10.5% | 11.2% | 11.5% | 11.5% | | 11.4% |
| Australia | 2050 | 5.1% | 2.9% | 4.7% | 4.0% | 5.1% | 5.1% | 5.1% | 4.8% | 6.5% | | 5.7% |
| Austria | 2050 | 5.1% | 2.9% | 4.7% | 4.0% | 5.1% | 5.1% | 5.1% | 4.8% | 6.5% | | 5.7% |
| Azerbaijan | 2050 | 10.5% | 8.4% | 10.2% | 9.4% | 10.5% | 10.5% | 11.2% | 11.5% | 11.5% | | 11.4% |
| Bangladesh | 2050 | 10.5% | 8.4% | 10.2% | 9.4% | 10.5% | 10.5% | 11.2% | 11.5% | 11.5% | | 11.4% |
| Belarus | 2050 | 10.5% | 8.4% | 10.2% | 9.4% | 10.5% | 10.5% | 11.2% | 11.5% | 11.5% | | 11.4% |
| Belgium | 2050 | 5.1% | 2.9% | 4.7% | 4.0% | 5.1% | 5.1% | 5.1% | 4.8% | 6.5% | | 5.7% |
| Bolivia | 2050 | 10.5% | 8.4% | 10.2% | 9.4% | 10.5% | 10.5% | 11.2% | 11.5% | 11.5% | | 11.4% |
| Bosnia and Herzegovina | 2050 | 10.5% | 8.4% | 10.2% | 9.4% | 10.5% | 10.5% | 11.2% | 11.5% | 11.5% | | 11.4% |
| Brazil | 2050 | 10.5% | 8.4% | 10.2% | 9.4% | 10.5% | 10.5% | 11.2% | 11.5% | 11.5% | | 11.4% |
| Bulgaria | 2050 | 10.5% | 8.4% | 10.2% | 9.4% | 10.5% | 10.5% | 11.2% | 11.5% | 11.5% | | 11.4% |
| Burkina Faso | 2050 | 10.5% | 8.4% | 10.2% | 9.4% | 10.5% | 10.5% | 11.2% | 11.5% | 11.5% | | 11.4% |
| Canada | 2050 | 5.1% | 2.9% | 4.7% | 4.0% | 5.1% | 5.1% | 5.1% | 4.8% | 6.5% | | 5.7% |
| Chile | 2050 | 5.1% | 2.9% | 4.7% | 4.0% | 5.1% | 5.1% | 5.1% | 4.8% | 6.5% | | 5.7% |
| China | 2050 | 5.1% | 2.9% | 4.7% | 4.0% | 5.1% | 5.1% | 5.1% | 4.8% | 6.5% | | 5.7% |
| Colombia | 2050 | 10.5% | 8.4% | 10.2% | 9.4% | 10.5% | 10.5% | 11.2% | 11.5% | 11.5% | | 11.4% |
| Costa Rica | 2050 | 10.5% | 8.4% | 10.2% | 9.4% | 10.5% | 10.5% | 11.2% | 11.5% | 11.5% | | 11.4% |
| Croatia | 2050 | 5.1% | 2.9% | 4.7% | 4.0% | 5.1% | 5.1% | 5.1% | 4.8% | 6.5% | | 5.7% |
| Cuba | 2050 | 10.5% | 8.4% | 10.2% | 9.4% | 10.5% | 10.5% | 11.2% | 11.5% | 11.5% | | 11.4% |
| Cyprus | 2050 | 5.1% | 2.9% | 4.7% | 4.0% | 5.1% | 5.1% | 5.1% | 4.8% | 6.5% | | 5.7% |
| Czech Republic | 2050 | 5.1% | 2.9% | 4.7% | 4.0% | 5.1% | 5.1% | 5.1% | 4.8% | 6.5% | | 5.7% |
| Denmark | 2050 | 5.1% | 2.9% | 4.7% | 4.0% | 5.1% | 5.1% | 5.1% | 4.8% | 6.5% | | 5.7% |
| Dominican Republic | 2050 | 10.5% | 8.4% | 10.2% | 9.4% | 10.5% | 10.5% | 11.2% | 11.5% | 11.5% | | 11.4% |
| Ecuador | 2050 | 10.5% | 8.4% | 10.2% | 9.4% | 10.5% | 10.5% | 11.2% | 11.5% | 11.5% | | 11.4% |
| Egypt | 2050 | 10.5% | 8.4% | 10.2% | 9.4% | 10.5% | 10.5% | 11.2% | 11.5% | 11.5% | | 11.4% |
| El Salvador | 2050 | 10.5% | 8.4% | 10.2% | 9.4% | 10.5% | 10.5% | 11.2% | 11.5% | 11.5% | | 11.4% |
| Estonia | 2050 | 5.1% | 2.9% | 4.7% | 4.0% | 5.1% | 5.1% | 5.1% | 4.8% | 6.5% | | 5.7% |
| Ethiopia | 2050 | 10.5% | 8.4% | 10.2% | 9.4% | 10.5% | 10.5% | 11.2% | 11.5% | 11.5% | | 11.4% |
| Finland | 2050 | 5.1% | 2.9% | 4.7% | 4.0% | 5.1% | 5.1% | 5.1% | 4.8% | 6.5% | | 5.7% |
| France | 2050 | 5.1% | 2.9% | 4.7% | 4.0% | 5.1% | 5.1% | 5.1% | 4.8% | 6.5% | | 5.7% |
| Germany | 2050 | 5.1% | 2.9% | 4.7% | 4.0% | 5.1% | 5.1% | 5.1% | 4.8% | 6.5% | | 5.7% |
| Ghana | 2050 | 10.5% | 8.4% | 10.2% | 9.4% | 10.5% | 10.5% | 11.2% | 11.5% | 11.5% | | 11.4% |
| Greece | 2050 | 5.1% | 2.9% | 4.7% | 4.0% | 5.1% | 5.1% | 5.1% | 4.8% | 6.5% | | 5.7% |
| Guatemala | 2050 | 10.5% | 8.4% | 10.2% | 9.4% | 10.5% | 10.5% | 11.2% | 11.5% | 11.5% | | 11.4% |
| Honduras | 2050 | 10.5% | 8.4% | 10.2% | 9.4% | 10.5% | 10.5% | 11.2% | 11.5% | 11.5% | | 11.4% |
| Hungary | 2050 | 5.1% | 2.9% | 4.7% | 4.0% | 5.1% | 5.1% | 5.1% | 4.8% | 6.5% | | 5.7% |
| India | 2050 | 10.5% | 8.4% | 10.2% | 9.4% | 10.5% | 10.5% | 11.2% | 11.5% | 11.5% | | 11.4% |
| Indonesia | 2050 | 10.5% | 8.4% | 10.2% | 9.4% | 10.5% | 10.5% | 11.2% | 11.5% | 11.5% | | 11.4% |
| Iran | 2050 | 10.5% | 8.4% | 10.2% | 9.4% | 10.5% | 10.5% | 11.2% | 11.5% | 11.5% | | 11.4% |
| Iraq | 2050 | 10.5% | 8.4% | 10.2% | 9.4% | 10.5% | 10.5% | 11.2% | 11.5% | 11.5% | | 11.4% |
| Ireland | 2050 | 5.1% | 2.9% | 4.7% | 4.0% | 5.1% | 5.1% | 5.1% | 4.8% | 6.5% | | 5.7% |
| Israel | 2050 | 5.1% | 2.9% | 4.7% | 4.0% | 5.1% | 5.1% | 5.1% | 4.8% | 6.5% | | 5.7% |
| Italy | 2050 | 5.1% | 2.9% | 4.7% | 4.0% | 5.1% | 5.1% | 5.1% | 4.8% | 6.5% | | 5.7% |
| Jamaica | 2050 | 10.5% | 8.4% | 10.2% | 9.4% | 10.5% | 10.5% | 11.2% | 11.5% | 11.5% | | 11.4% |
| Japan | 2050 | 5.1% | 2.9% | 4.7% | 4.0% | 5.1% | 5.1% | 5.1% | 4.8% | 6.5% | | 5.7% |
| Jordan | 2050 | 10.5% | 8.4% | 10.2% | 9.4% | 10.5% | 10.5% | 11.2% | 11.5% | 11.5% | | 11.4% |
| Kazakhstan | 2050 | 10.5% | 8.4% | 10.2% | 9.4% | 10.5% | 10.5% | 11.2% | 11.5% | 11.5% | | 11.4% |
| Kenya | 2050 | 10.5% | 8.4% | 10.2% | 9.4% | 10.5% | 10.5% | 11.2% | 11.5% | 11.5% | | 11.4% |
| Korea, Republic of | 2050 | 5.1% | 2.9% | 4.7% | 4.0% | 5.1% | 5.1% | 5.1% | 4.8% | 6.5% | | 5.7% |
| Kuwait | 2050 | 5.1% | 2.9% | 4.7% | 4.0% | 5.1% | 5.1% | 5.1% | 4.8% | 6.5% | | 5.7% |
| Latvia | 2050 | 5.1% | 2.9% | 4.7% | 4.0% | 5.1% | 5.1% | 5.1% | 4.8% | 6.5% | | 5.7% |
| Lebanon | 2050 | 10.5% | 8.4% | 10.2% | 9.4% | 10.5% | 10.5% | 11.2% | 11.5% | 11.5% | | 11.4% |
| Lithuania | 2050 | 5.1% | 2.9% | 4.7% | 4.0% | 5.1% | 5.1% | 5.1% | 4.8% | 6.5% | | 5.7% |
| Luxembourg | 2050 | 5.1% | 2.9% | 4.7% | 4.0% | 5.1% | 5.1% | 5.1% | 4.8% | 6.5% | | 5.7% |
| Malaysia | 2050 | 10.5% | 8.4% | 10.2% | 9.4% | 10.5% | 10.5% | 11.2% | 11.5% | 11.5% | | 11.4% |
| Malta | 2050 | 5.1% | 2.9% | 4.7% | 4.0% | 5.1% | 5.1% | 5.1% | 4.8% | 6.5% | | 5.7% |
| Mauritius | 2050 | 10.5% | 8.4% | 10.2% | 9.4% | 10.5% | 10.5% | 11.2% | 11.5% | 11.5% | | 11.4% |
| Mexico | 2050 | 10.5% | 8.4% | 10.2% | 9.4% | 10.5% | 10.5% | 11.2% | 11.5% | 11.5% | | 11.4% |
| Mongolia | 2050 | 10.5% | 8.4% | 10.2% | 9.4% | 10.5% | 10.5% | 11.2% | 11.5% | 11.5% | | 11.4% |
| Montenegro | 2050 | 10.5% | 8.4% | 10.2% | 9.4% | 10.5% | 10.5% | 11.2% | 11.5% | 11.5% | | 11.4% |
| Morocco | 2050 | 10.5% | 8.4% | 10.2% | 9.4% | 10.5% | 10.5% | 11.2% | 11.5% | 11.5% | | 11.4% |
| Myanmar | 2050 | 10.5% | 8.4% | 10.2% | 9.4% | 10.5% | 10.5% | 11.2% | 11.5% | 11.5% | | 11.4% |
| Namibia | 2050 | 10.5% | 8.4% | 10.2% | 9.4% | 10.5% | 10.5% | 11.2% | 11.5% | 11.5% | | 11.4% |
| Netherlands | 2050 | 5.1% | 2.9% | 4.7% | 4.0% | 5.1% | 5.1% | 5.1% | 4.8% | 6.5% | | 5.7% |
| New Zealand | 2050 | 5.1% | 2.9% | 4.7% | 4.0% | 5.1% | 5.1% | 5.1% | 4.8% | 6.5% | | 5.7% |
| Nicaragua | 2050 | 10.5% | 8.4% | 10.2% | 9.4% | 10.5% | 10.5% | 11.2% | 11.5% | 11.5% | | 11.4% |
| Norway | 2050 | 5.1% | 2.9% | 4.7% | 4.0% | 5.1% | 5.1% | 5.1% | 4.8% | 6.5% | | 5.7% |
| Pakistan | 2050 | 10.5% | 8.4% | 10.2% | 9.4% | 10.5% | 10.5% | 11.2% | 11.5% | 11.5% | | 11.4% |
| Panama | 2050 | 5.1% | 2.9% | 4.7% | 4.0% | 5.1% | 5.1% | 5.1% | 4.8% | 6.5% | | 5.7% |
| Peru | 2050 | 10.5% | 8.4% | 10.2% | 9.4% | 10.5% | 10.5% | 11.2% | 11.5% | 11.5% | | 11.4% |
| Philippines | 2050 | 10.5% | 8.4% | 10.2% | 9.4% | 10.5% | 10.5% | 11.2% | 11.5% | 11.5% | | 11.4% |
| Poland | 2050 | 5.1% | 2.9% | 4.7% | 4.0% | 5.1% | 5.1% | 5.1% | 4.8% | 6.5% | | 5.7% |
| Portugal | 2050 | 5.1% | 2.9% | 4.7% | 4.0% | 5.1% | 5.1% | 5.1% | 4.8% | 6.5% | | 5.7% |
| Romania | 2050 | 5.1% | 2.9% | 4.7% | 4.0% | 5.1% | 5.1% | 5.1% | 4.8% | 6.5% | | 5.7% |
| Russian Federation | 2050 | 10.5% | 8.4% | 10.2% | 9.4% | 10.5% | 10.5% | 11.2% | 11.5% | 11.5% | | 11.4% |
| Rwanda | 2050 | 10.5% | 8.4% | 10.2% | 9.4% | 10.5% | 10.5% | 11.2% | 11.5% | 11.5% | | 11.4% |
| Saudi Arabia | 2050 | 5.1% | 2.9% | 4.7% | 4.0% | 5.1% | 5.1% | 5.1% | 4.8% | 6.5% | | 5.7% |
| Senegal | 2050 | 10.5% | 8.4% | 10.2% | 9.4% | 10.5% | 10.5% | 11.2% | 11.5% | 11.5% | | 11.4% |
| Singapore | 2050 | 5.1% | 2.9% | 4.7% | 4.0% | 5.1% | 5.1% | 5.1% | 4.8% | 6.5% | | 5.7% |
| Slovakia | 2050 | 5.1% | 2.9% | 4.7% | 4.0% | 5.1% | 5.1% | 5.1% | 4.8% | 6.5% | | 5.7% |
| Slovenia | 2050 | 5.1% | 2.9% | 4.7% | 4.0% | 5.1% | 5.1% | 5.1% | 4.8% | 6.5% | | 5.7% |
| South Africa | 2050 | 10.5% | 8.4% | 10.2% | 9.4% | 10.5% | 10.5% | 11.2% | 11.5% | 11.5% | | 11.4% |
| Spain | 2050 | 5.1% | 2.9% | 4.7% | 4.0% | 5.1% | 5.1% | 5.1% | 4.8% | 6.5% | | 5.7% |
| Sri Lanka | 2050 | 10.5% | 8.4% | 10.2% | 9.4% | 10.5% | 10.5% | 11.2% | 11.5% | 11.5% | | 11.4% |
| Sweden | 2050 | 5.1% | 2.9% | 4.7% | 4.0% | 5.1% | 5.1% | 5.1% | 4.8% | 6.5% | | 5.7% |
| Switzerland | 2050 | 5.1% | 2.9% | 4.7% | 4.0% | 5.1% | 5.1% | 5.1% | 4.8% | 6.5% | | 5.7% |
| Taiwan | 2050 | 5.1% | 2.9% | 4.7% | 4.0% | 5.1% | 5.1% | 5.1% | 4.8% | 6.5% | | 5.7% |
| Thailand | 2050 | 10.5% | 8.4% | 10.2% | 9.4% | 10.5% | 10.5% | 11.2% | 11.5% | 11.5% | | 11.4% |
| Tunisia | 2050 | 10.5% | 8.4% | 10.2% | 9.4% | 10.5% | 10.5% | 11.2% | 11.5% | 11.5% | | 11.4% |
| Turkey | 2050 | 10.5% | 8.4% | 10.2% | 9.4% | 10.5% | 10.5% | 11.2% | 11.5% | 11.5% | | 11.4% |
| Uganda | 2050 | 10.5% | 8.4% | 10.2% | 9.4% | 10.5% | 10.5% | 11.2% | 11.5% | 11.5% | | 11.4% |
| Ukraine | 2050 | 10.5% | 8.4% | 10.2% | 9.4% | 10.5% | 10.5% | 11.2% | 11.5% | 11.5% | | 11.4% |
| United Arab Emirates | 2050 | 5.1% | 2.9% | 4.7% | 4.0% | 5.1% | 5.1% | 5.1% | 4.8% | 6.5% | | 5.7% |
| United Kingdom | 2050 | 5.1% | 2.9% | 4.7% | 4.0% | 5.1% | 5.1% | 5.1% | 4.8% | 6.5% | | 5.7% |
| United States of America | 2050 | 5.1% | 2.9% | 4.7% | 4.0% | 5.1% | 5.1% | 5.1% | 4.8% | 6.5% | | 5.7% |
| Uruguay | 2050 | 5.1% | 2.9% | 4.7% | 4.0% | 5.1% | 5.1% | 5.1% | 4.8% | 6.5% | | 5.7% |
| Venezuela | 2050 | 10.5% | 8.4% | 10.2% | 9.4% | 10.5% | 10.5% | 11.2% | 11.5% | 11.5% | | 11.4% |
| Viet Nam | 2050 | 10.5% | 8.4% | 10.2% | 9.4% | 10.5% | 10.5% | 11.2% | 11.5% | 11.5% | | 11.4% |
| Yemen | 2050 | 10.5% | 8.4% | 10.2% | 9.4% | 10.5% | 10.5% | 11.2% | 11.5% | 11.5% | | 11.4% |

Table S2: Countries included in GCAM v7.0 and their regional aggregation in the study

| **Aggregated Region** | **Countries** |
| --- | --- |
| Africa | Algeria, Angola, Benin, Botswana, Burkina Faso, Burundi, Cameroon, Cape Verde, Central African Republic, Chad, Comoros, Congo, Cote d’Ivoire, Democratic Republic of the Congo, Djibouti, Egypt, Equatorial Guinea, Eritrea, Ethiopia, Gabon, Gambia, Ghana, Guinea, Guinea-Bissau, Kenya, Lesotho, Liberia, Libya, Madagascar, Malawi, Mali, Mauritania, Mauritius, Morocco, Mozambique, Namibia, Niger, Nigeria, Reunion, Rwanda, Sao Tome and Principe, Senegal, Sierra Leone, Somalia, South Africa, Sudan, Swaziland, Tanzania, Togo, Tunisia, Uganda, Western Sahara, Zambia, Zimbabwe |
| China | China |
| India | India |
| Latin America | Anguilla, Antigua & Barbuda, Argentina, Aruba, Bahamas, Barbados, Belize, Bermuda, Bolivia, Brazil, Cayman Islands, Chile, Colombia, Costa Rica, Cuba, Dominica, Dominican Republic, Ecuador, El Salvador, French Guiana, Grenada, Guadeloupe, Guatemala, Guyana, Haiti, Honduras, Jamaica, Martinique, Mexico, Montserrat, Netherlands Antilles, Nicaragua, Panama, Paraguay, Peru, Saint Kitts and Nevis, Saint Lucia, Saint Vincent and the Grenadines, Suriname, Trinidad and Tobago, Uruguay, Venezuela |
| South and East Asia (S_E_Asia) | American Samoa, Bangladesh, Bhutan, Brunei Darussalam, Cambodia, Christmas Island, Cocos (Keeling) Islands, Cook Islands, Federated States of Micronesia, Fiji, French Polynesia, Guam, Kiribati, Lao Peoples Democratic Republic, Malaysia, Maldives, Marshall Islands, Mayotte, Myanmar, Nauru, Nepal, New Caledonia, Niue, Norfolk Island, Northern Mariana Islands, Pacific Islands Trust Territory, Palau, Papua New Guinea, Philippines, Pitcairn Islands, Russian Federation, Turkey, Samoa, Seychelles, Singapore, Solomon Islands, South Korea, Sri Lanka, Taiwan, Thailand, Timor Leste, Tokelau, Tonga, Tuvalu, Vanuatu, Viet Nam |
| Rest of Asia (RoA) | Afghanistan, Armenia, Azerbaijan, Bahrain, Democratic People’s Republic of Korea, Georgia, Iran, Iraq, Israel, Jordan, Kazakhstan, Kuwait, Kyrgyzstan, Lebanon, Mongolia, Oman, Pakistan, Palestine, Qatar, Russian Federation, Saudi Arabia, South Korea, Syria, Tajikistan, Turkmenistan, United Arab Emirates, Uzbekistan, Yemen |
| West | Albania, Andorra, Australia, Austria, Belarus, Belgium, Bosnia and Herzegovina, Bulgaria, Canada, Croatia, Cyprus, Czech Republic, Denmark, Estonia, Finland, France, Germany, Greece, Greenland, Hungary, Iceland, Ireland, Italy, Latvia, Lithuania, Luxembourg, Macedonia, Malta, Moldova, Monaco, Montenegro, Netherlands, New Zealand, Norway, Poland, Portugal, Romania, Serbia, Slovakia, Slovenia, Spain, Sweden, Switzerland, Ukraine, United Kingdom, United States of America |

Table S3: Windfall profits tax revenue allocation by country

| **Aggregated Region** | **Country** | **Subsidy per country | USD2023** |
| --- | --- | --- |
| West | Austria | 0 |
| West | Belarus | 9,890,623,535 |
| West | Belgium | 0 |
| West | Bosnia and Herzegovina | 10,523,591,899 |
| West | Bulgaria | 6,763,516,837 |
| West | Croatia | 6,448,458,770 |
| West | Cyprus | 5,952,744,430 |
| West | Czech Republic | 6,297,191,073 |
| West | Denmark | 0 |
| West | Estonia | 5,014,245,149 |
| West | Finland | 0 |
| West | France | 0 |
| West | Germany | 0 |
| West | Greece | 6,909,847,302 |
| West | Hungary | 7,193,783,445 |
| West | Ireland | 5,624,597,462 |
| West | Italy | 13,559,084,771 |
| West | Latvia | 5,975,315,991 |
| West | Lithuania | 5,506,086,352 |
| West | Luxembourg | 0 |
| West | Malta | 0 |
| West | Montenegro | 7,953,852,802 |
| West | Netherlands | 0 |
| West | Norway | 5,466,292,248 |
| West | Poland | 9,168,367,912 |
| West | Portugal | 6,727,274,256 |
| West | Romania | 7,572,010,106 |
| West | Slovakia | 5,827,519,300 |
| West | Slovenia | 5,454,836,369 |
| West | Spain | 11,328,194,730 |
| West | Sweden | 0 |
| West | Switzerland | 0 |
| West | Ukraine | 12,591,800,146 |
| West | United Kingdom | 0 |
| West | USA | 0 |
| West | Canada | 0 |
| West | New Zealand | 0 |
| West | Australia | 0 |
| Africa | Ethiopia | 29,454,523,327 |
| Africa | Egypt | 14,287,596,263 |
| Africa | South Africa | 10,697,895,460 |
| Africa | Kenya | 16,973,861,202 |
| Africa | Uganda | 27,389,438,080 |
| Africa | Algeria | 13,286,093,306 |
| Africa | Morocco | 10,992,665,792 |
| Africa | Ghana | 16,440,383,637 |
| Africa | Burkina Faso | 29,152,694,807 |
| Africa | Senegal | 19,155,442,354 |
| Africa | Rwanda | 29,200,577,148 |
| Africa | Tunisia | 11,144,957,011 |
| Africa | Namibia | 9,291,894,830 |
| Africa | Mauritius | 6,459,557,472 |
| Rest of Asia (RoA) | Lebanon | 15,942,201,130 |
| Rest of Asia (RoA) | Yemen | 36,766,790,396 |
| Rest of Asia (RoA) | Iran | 15,040,992,300 |
| Rest of Asia (RoA) | Iraq | 12,505,549,126 |
| Rest of Asia (RoA) | Türkiye | 15,188,904,708 |
| Rest of Asia (RoA) | Azerbaijan | 8,964,482,203 |
| Rest of Asia (RoA) | Kazakhstan | 8,111,463,120 |
| Rest of Asia (RoA) | Russian Federation | 19,665,855,274 |
| Rest of Asia (RoA) | Saudi Arabia | 11,193,348,241 |
| Rest of Asia (RoA) | United Arab Emirates | 13,152,833,030 |
| Rest of Asia (RoA) | Kuwait | 8,812,587,781 |
| Rest of Asia (RoA) | Israel | 8,571,948,309 |
| Rest of Asia (RoA) | Jordan | 13,414,473,406 |
| South and East Asia (S_E_Asia) | Sri Lanka | 11,410,348,291 |
| South and East Asia (S_E_Asia) | Myanmar | 17,985,296,843 |
| South and East Asia (S_E_Asia) | Pakistan | 19,604,307,901 |
| South and East Asia (S_E_Asia) | Mongolia | 9,753,467,319 |
| South and East Asia (S_E_Asia) | Bangladesh | 16,873,138,596 |
| South and East Asia (S_E_Asia) | Indonesia | 18,994,329,240 |
| South and East Asia (S_E_Asia) | Philippines | 10,340,446,128 |
| South and East Asia (S_E_Asia) | Malaysia | 7,069,452,164 |
| South and East Asia (S_E_Asia) | Singapore | 5,697,785,035 |
| South and East Asia (S_E_Asia) | India | 6,021,516,219 |
| South and East Asia (S_E_Asia) | Thailand | 41,204,635,692 |
| South and East Asia (S_E_Asia) | Taiwan | 11,091,292,513 |
| South and East Asia (S_E_Asia) | Republic of Korea | 5,963,263,422 |
| South and East Asia (S_E_Asia) | China | 11,961,705,665 |
| South and East Asia (S_E_Asia) | Japan | 0 |
| South and East Asia (S_E_Asia) | Vietnam | 0 |
| Latin America | Mexico | 14,773,458,779 |
| Latin America | Argentina | 14,338,360,311 |
| Latin America | Ecuador | 12,764,941,254 |
| Latin America | Nicaragua | 14,491,858,145 |
| Latin America | Bolivia | 12,046,084,892 |
| Latin America | Costa Rica | 8,046,636,698 |
| Latin America | El Salvador | 11,467,712,540 |
| Latin America | Guatemala | 11,039,641,455 |
| Latin America | Brazil | 18,050,916,444 |
| Latin America | Colombia | 9,985,439,227 |
| Latin America | Peru | 9,115,688,769 |
| Latin America | Honduras | 13,465,870,013 |
| Latin America | Panama | 5,696,807,306 |
| Latin America | Uruguay | 5,871,511,338 |
| Latin America | Chile | 0 |
| Latin America | Costa Rica | 8,046,636,698 |
| Latin America | Venezuela | 17,502,189,990 |
| Latin America | Jamaica | 10,317,016,513 |


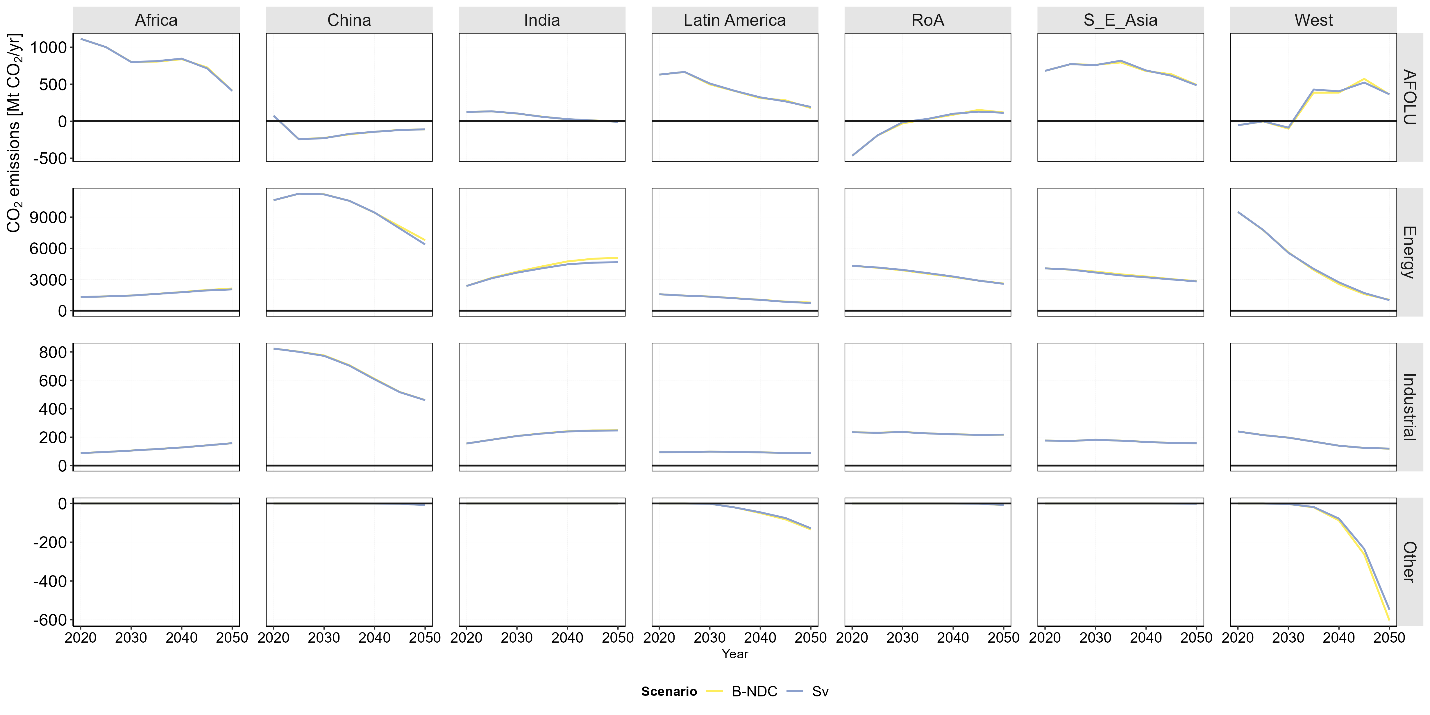


Figure S1: Regional CO2 emissions trajectories. CO2 emission pathways from agriculture, forestry and other land use (AFOLU), energy, industrial processes, and other (DACCS) by region in *Sv* and *B-NDC* scenarios.


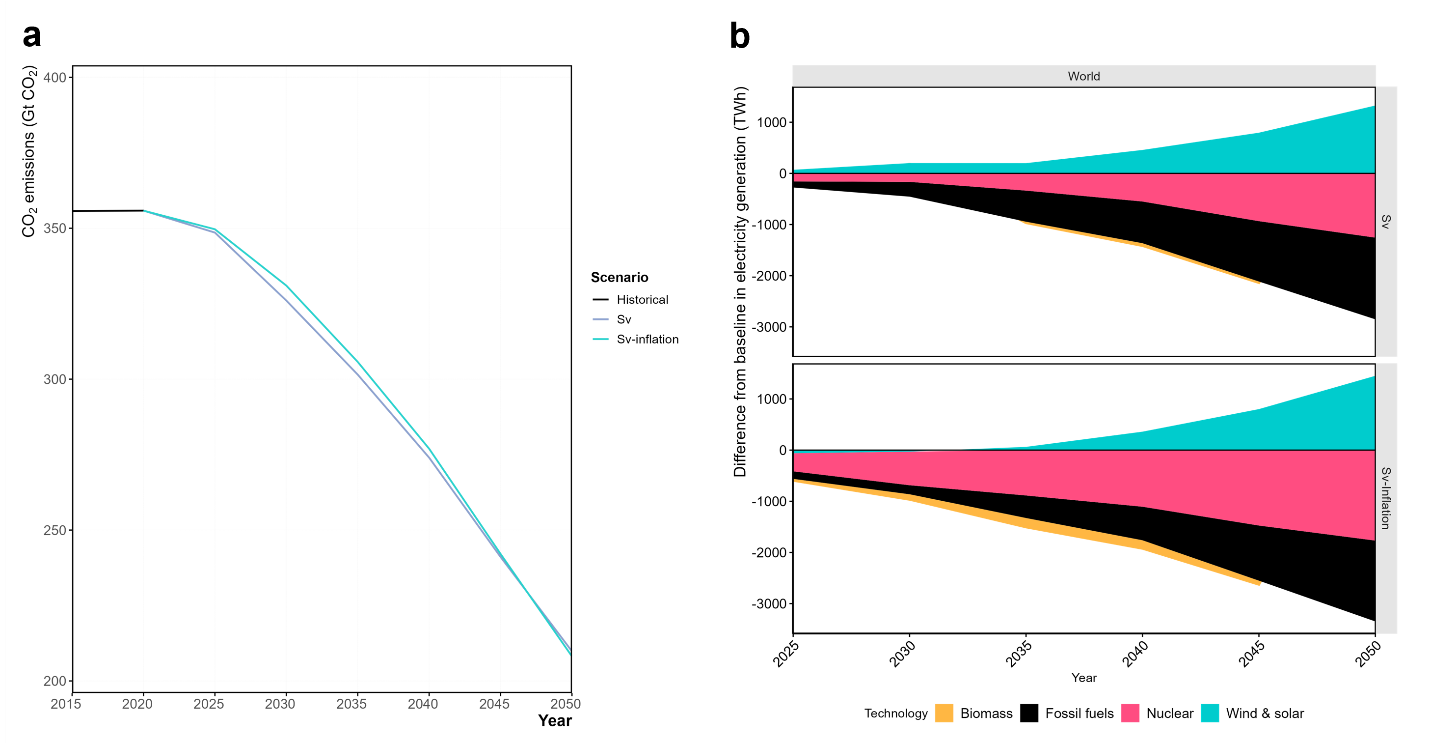


Figure S2: Global impacts of rising inflation. (a) Global CO2 emissions from energy and industrial processes in *Sv* scenarios with varying inflation; (b) Electricity generation by technology relative to the *B-NDC* in *Sv* scenarios with inflation.


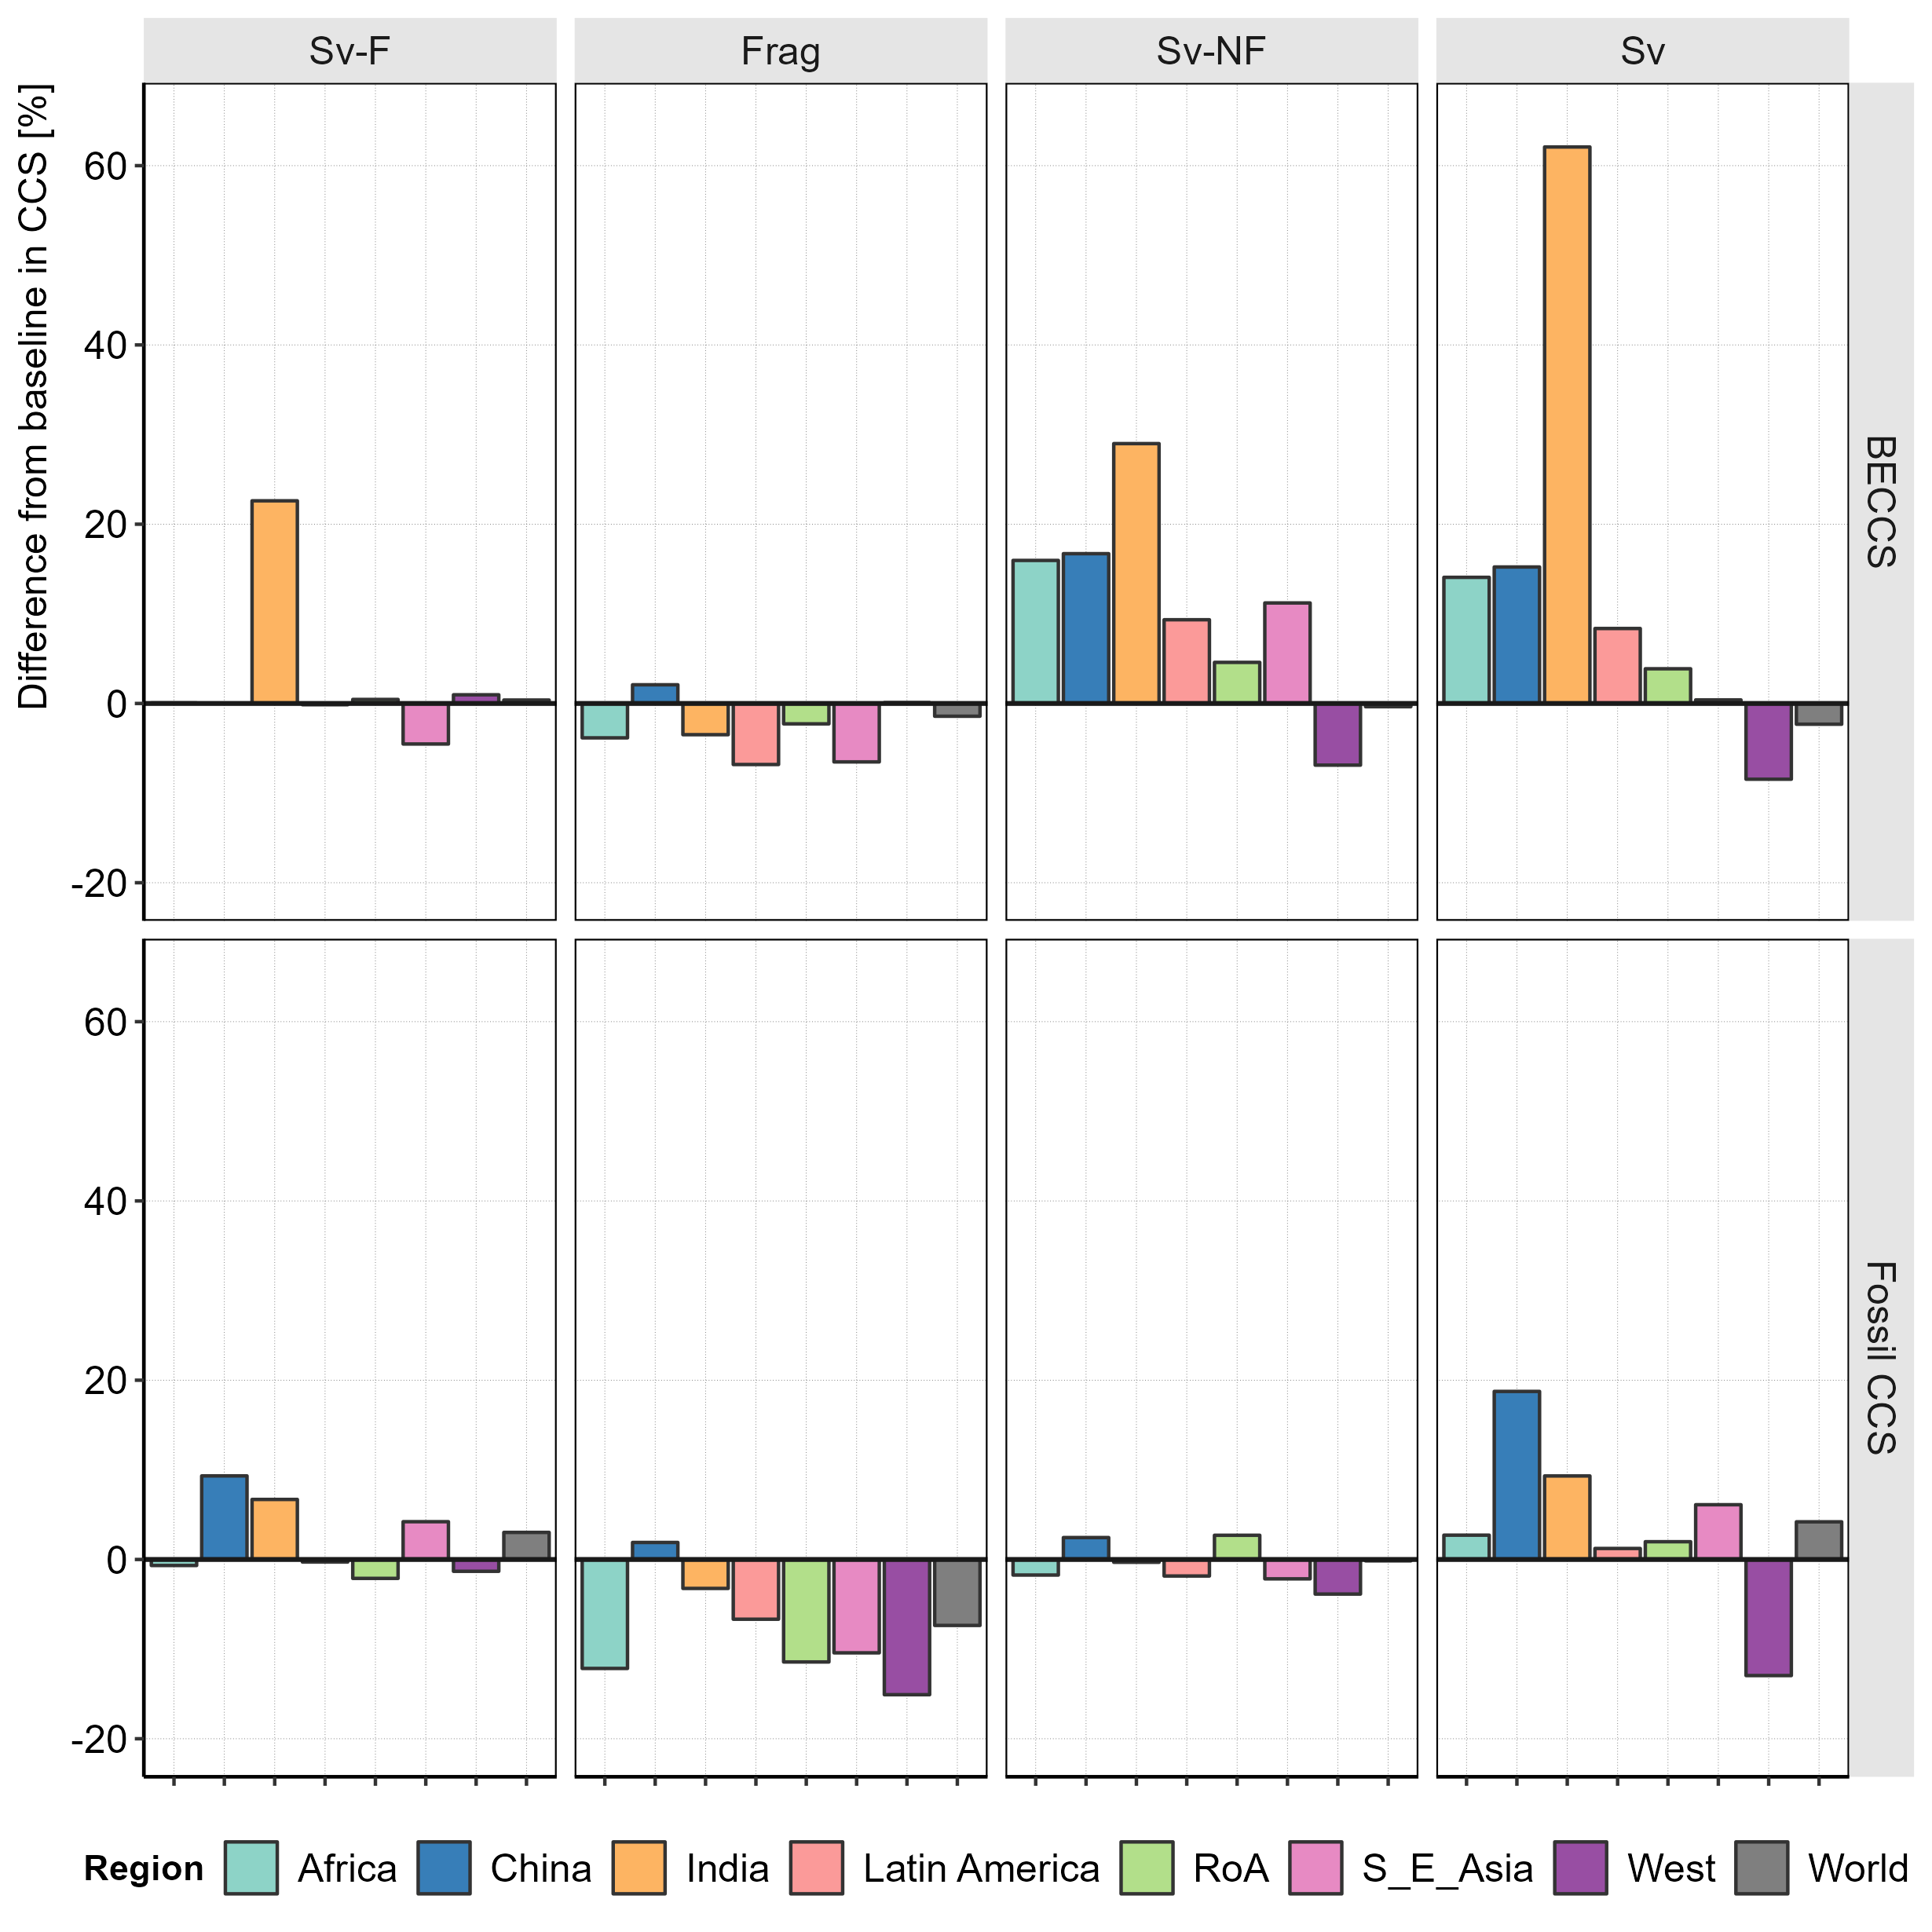


Figure S3: Regional implications on carbon capture ans storage (CCS) of different WACC projections on top of NDCs. Percentage change of Biomass CCS (BECCS) and Fossil CCS by scenario and region compared to B-NDC in 2050.
